# Supplementary material
Source: PubMed Central journal article supplement (PMC6452268)
Supplement: rstb20180090supp1.pdf [file rstb20180090supp1.pdf]

## Supplementary Information

### Different genetic and morphological outcomes for phages targeted by single or multiple CRISPR-Cas spacers

B.N.J. Watson<sup>1</sup>, R.A. Easingwood<sup>2</sup>, B. Tong<sup>1</sup>, M. Wolf<sup>3</sup>, G.P.C. Salmond<sup>4</sup>, R.H.J. Staals<sup>1,5</sup>, M. Bostina<sup>1,2\*</sup> and P.C. Fineran<sup>1,6\*</sup>

*Philosophical Transactions of the Royal Society B* 2019

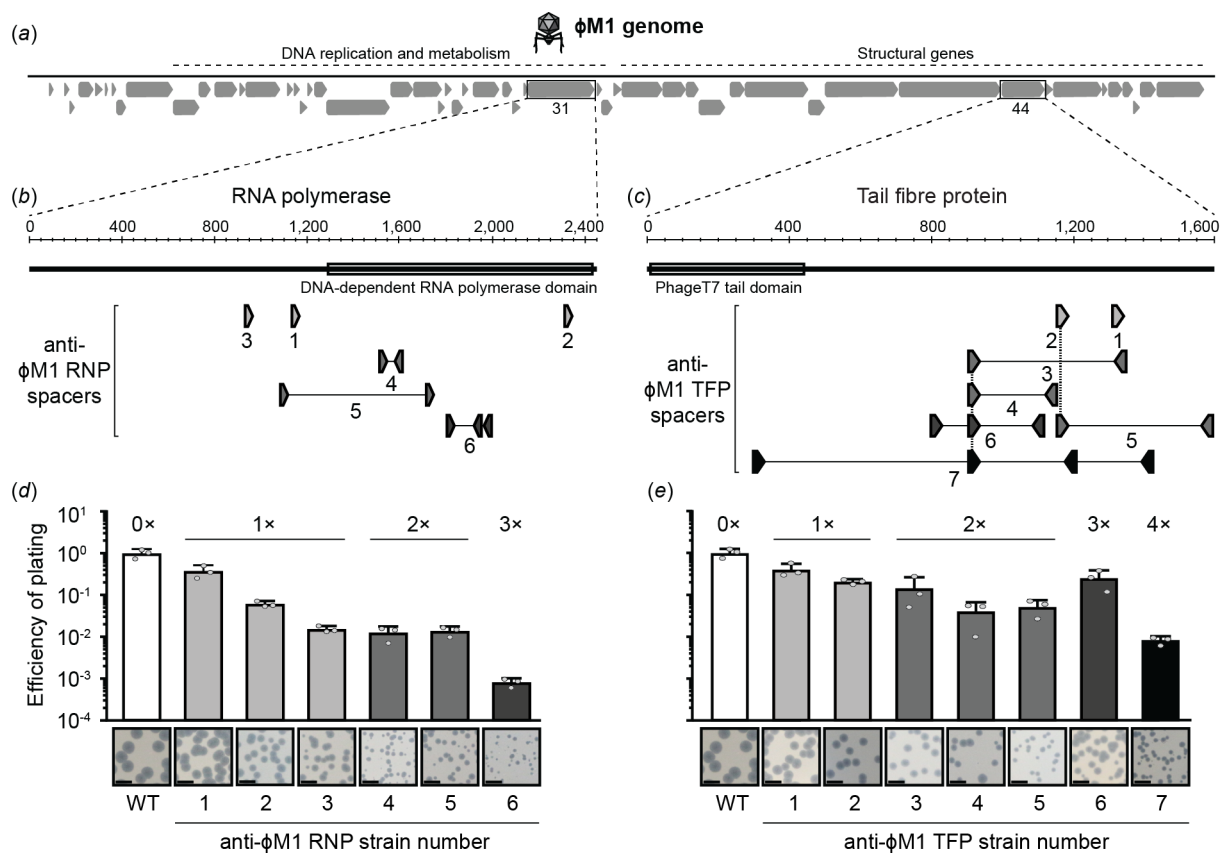

**Figure S1.** Phage-targeting spacers reduce phage infectivity. (a) Schematic of the  $\phi$ M1 genome showing the locations of (b) the RNA polymerase gene (RNP, phiM1\_31) with the targeting spacers, and (c) a tail fibre protein gene (TFP, phiM1\_44) with the targeting spacers. EOPs and representative plaque morphology images of the (d) anti- $\phi$ M1 RNP and (e) anti- $\phi$ M1 TFP strains, with white bars: WT (0 spacers), light grey: 1 $\times$ , mid grey: 2 $\times$ , dark grey: 3 $\times$  and black: 4 $\times$  anti- $\phi$  spacers. Data shown in the mean +SD ( $n=3$ ). Spacers shared by different strains have been identified with vertical dashed lines (c) and the limit of detection in (d) and (e) is  $1 \times 10^{-10}$ . The plaque image scale bars represent 5 mm. Full details of EOP and plaque size measurements are in table S3.

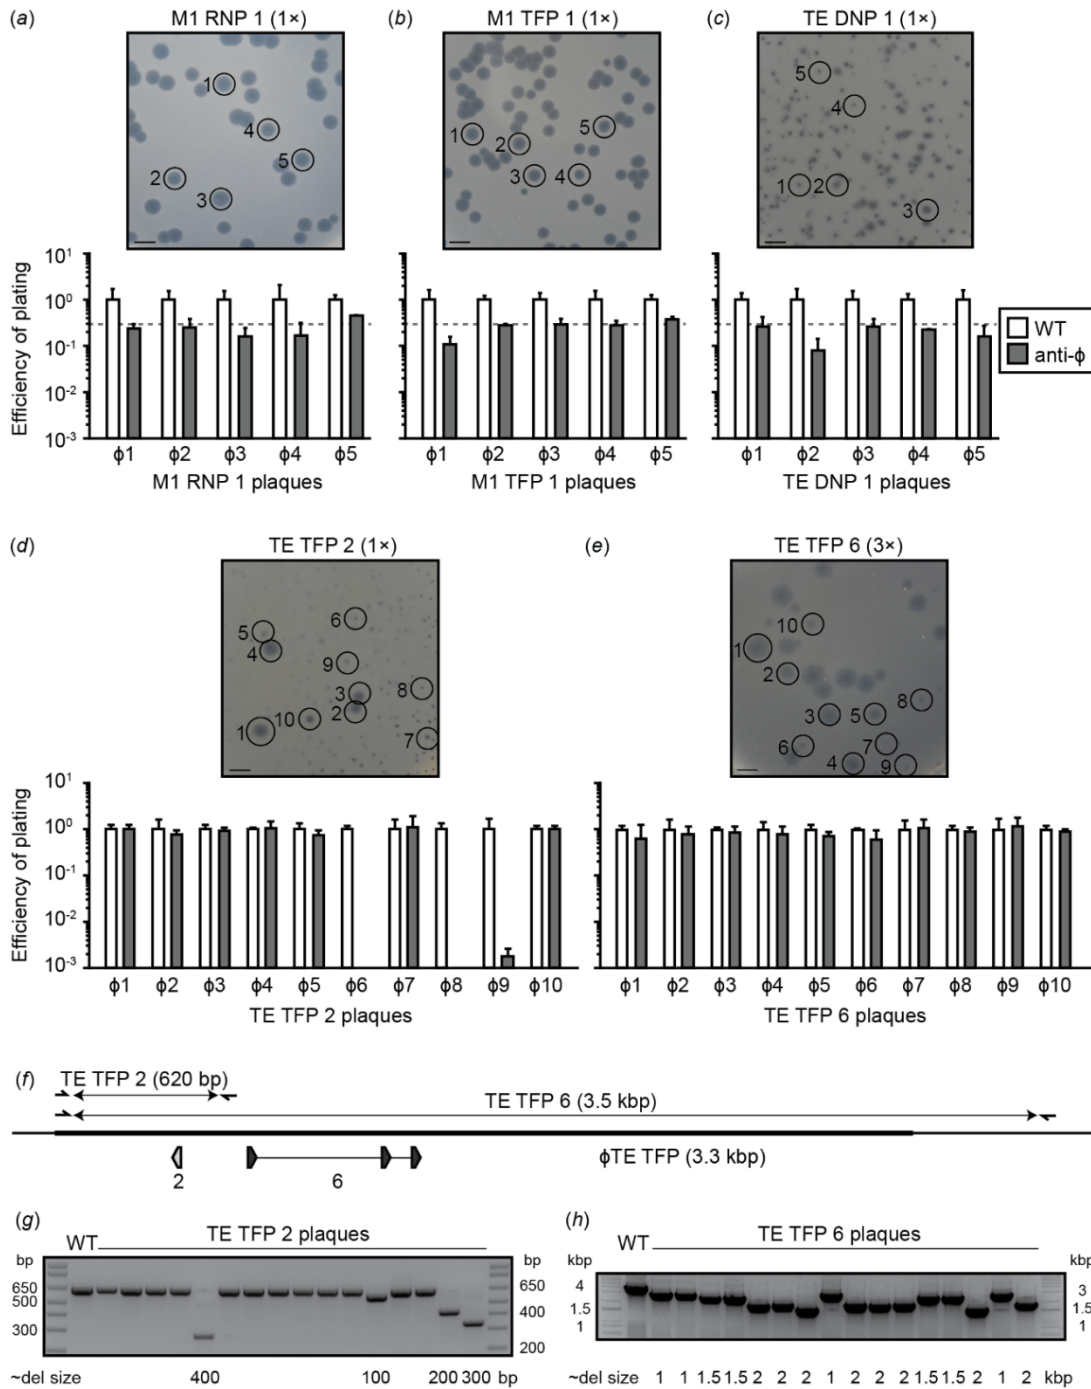

**Figure S2.** Phages that replicate on phage-resistant strains are phenotypic or genotypic escapes. (a), (b) & (c) Five plaques were retired on WT (white) and the anti- $\phi$  strain (grey) from (a) M1 RNP 1, (b) M1 TFP 1 and (c) TE DNP 1. The dashed line represents the EOPs for the strains from figure 1. (d) & (e) 10 plaques were picked and retired on WT (white) and the anti- $\phi$  strain (grey) from (d) TE TFP 2 and (e) TE TFP 6. The EOPs for the strains were below the limit of detection. (f), (g) & (h) 16 genotypic escape phages, that infected the anti- $\phi$  strains with an EOP of 1, from (g) TE TFP 2 and (h) TE TFP 6 were screened for deletions using PCR. (f) Schematic showing the  $\phi$ TE TFP gene and the primers used to amplify the region targeted by the (g) TE TFP 2 spacer (PF1635 and PF2146) and the entire gene, plus 200 bp downstream for (h) TE TFP 6 (PF1635 and PF2144, table S2). Product sizes were compared to the Invitrogen 1 kb Plus DNA ladder.

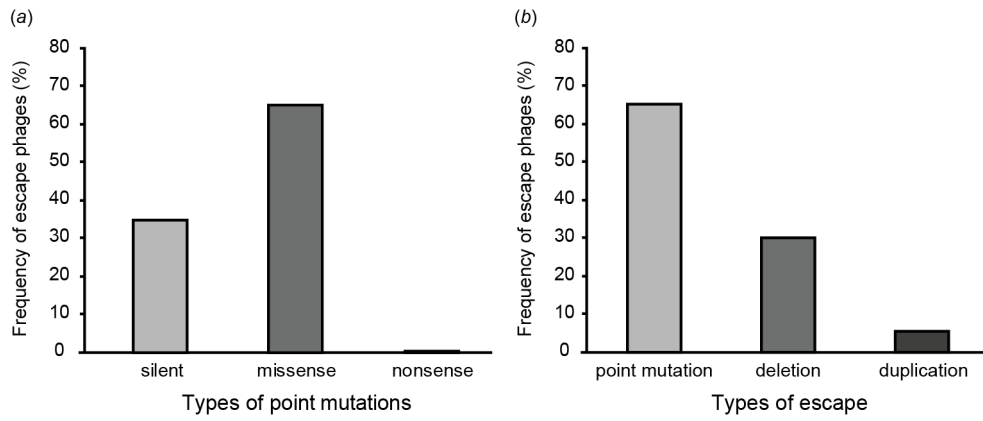

**Figure S3.** More phages evade CRISPR-Cas targeting of a single spacer through point mutation than deletion or duplication. (a) The consequences of the point mutations on the coding sequence and (b) the frequency type of escape.

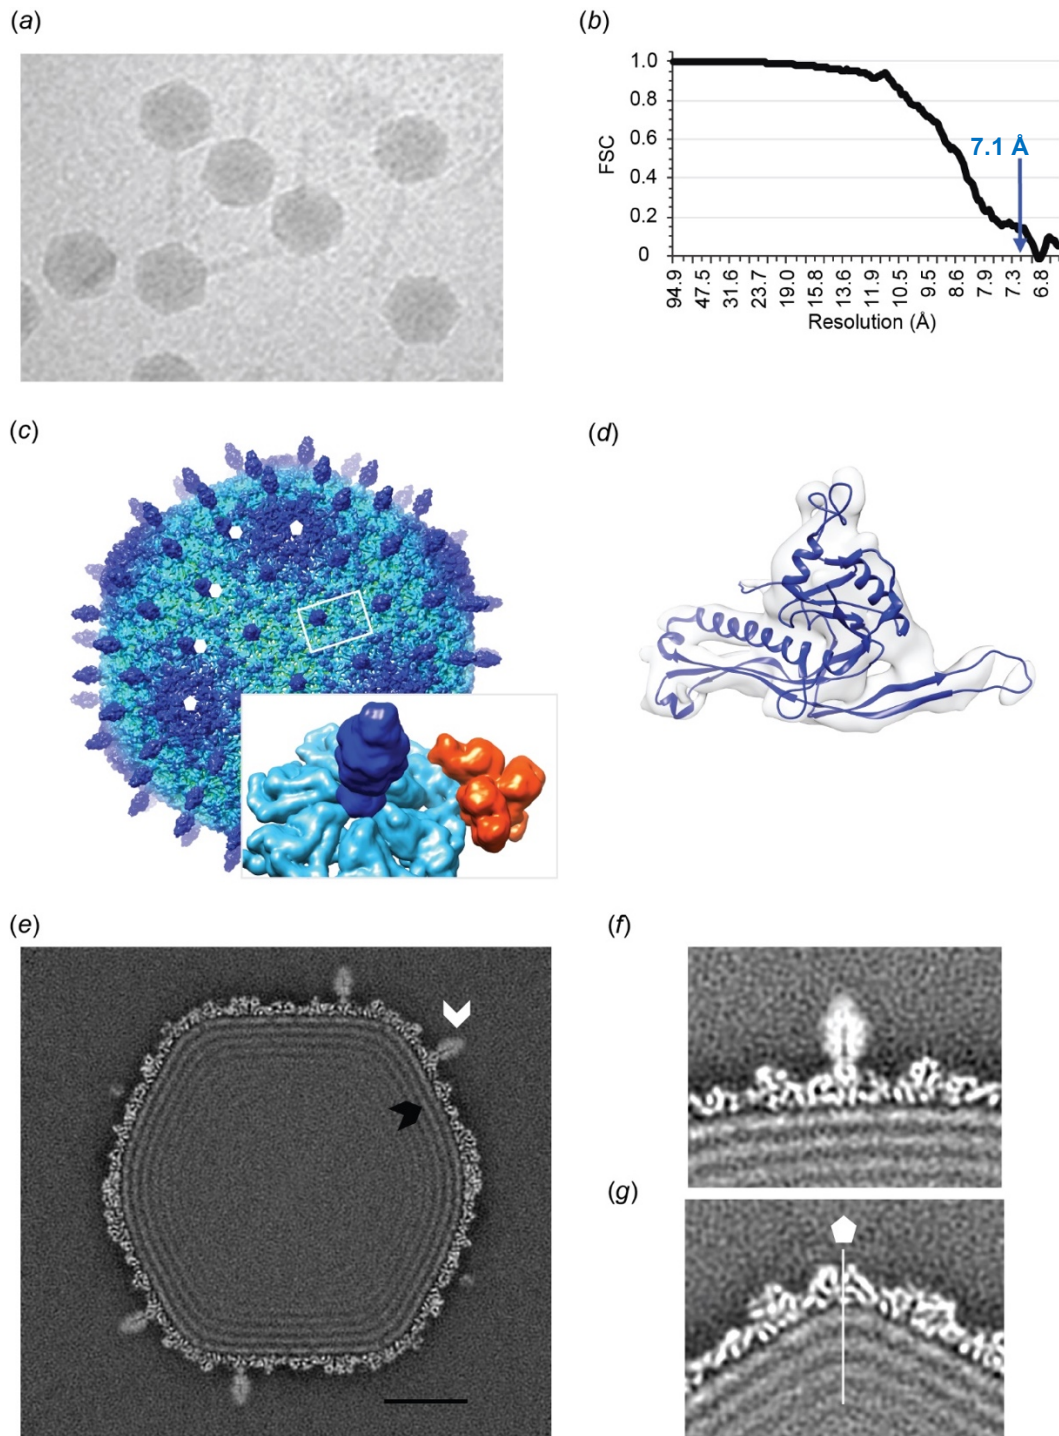

**Figure S4.** Cryo-EM analysis of wild type  $\phi$ TE. (a) Area of a cryo electron micrograph showing  $\phi$ TE phages. (b) Fourier shell correlation (FSC) curve showing a 7.1 Å resolution for the full capsid. (c) Radially coloured surface representation of the capsid showing the T=13 triangulation number. A total of 780 copies of the major capsid protein form 12 pentamers and 120 hexamers that assemble into an icosahedral capsid, which has a maximum diameter of 980 Å. The five-fold axes are indicated by a pentagon, while the centre of the hexamers are indicated by hexagons. At the bottom, the insert shows the segmented densities corresponding to the decoration proteins (blue), hexamers (cyan), and trifolium-like density (red). The decoration protein appears to have a thin, elongated cavity at its interior. (d) Individual density of the major capsid protein (transparent) shows the specific HK97 fold (blue ribbon – protein data bank accession no: 2FT1). (e) Central slice through the map; concentric rings of DNA with a 25 Å spacing are visible inside the capsid (black arrow) and pagoda-shaped decoration proteins (white arrow) are present at the exterior of the capsid and (f) are shown as a slice through the map. (g) Slice through the cryo-EM along the five-fold axis showing the induced curvature on the capsid coat and the interior genome shells.

**Table S1. Strains with phage-targeting spacers**

| Strain | PCF#   | #* | Pos† | CRISPR1 sequence‡                        | Pos | CRISPR2 sequence                       | Ref        |
|--------|--------|----|------|------------------------------------------|-----|----------------------------------------|------------|
| TE DNP |        |    |      |                                          |     |                                        |            |
| 1      | PCF452 | 1  | -1   | AACTTATTGAAAAGTCTAAGATCGTATCCGTA         |     |                                        | This study |
| 2      | PCF461 | 1  | -2   | CCTGCTTGCCGTTGAGACTTCCCATGCACTTG         |     |                                        | This study |
|        |        |    | -1   | <i>GAGCGCTTTTCCGCTGCATAACCCCTGCTTCGG</i> |     |                                        |            |
| 3      | PCF454 | 1  | -1   | TCACGCAGTTTAAAGCGCCGCTCTTCGTCAAA         |     |                                        | This study |
| 4      | PCF455 | 1  | -1   | <i>GCGACGATAGTCATGCCCGCGCCACCGGAA</i>    | -1  | GTCCTCGATTACACGGTCGCAATACTTCCACA       | This study |
| 5      | PCF456 | 2  | -2   | ATGATCAGGCCGTTAAGTTTATTGCTTCAAAA         |     |                                        | This study |
|        |        |    | -1   | TTGTCAGGACGCTGTTTCTTAAACTGGTCCTT         |     |                                        |            |
| 6      | PCF453 | 2  | -2   | GTATCCGTAGGCATTGTGACATGCCAAAGCCC         | -1  | AGATAATTGGCATAATGTTTCTACCCAAAGAAA      | This study |
|        |        |    | -1   | <i>CTTGATCCGGCAAACAACCACCGCTGGTAGC</i>   |     |                                        |            |
| 7      | PCF457 | 3  | -2   | TCTCCGGGCAACCACGGGGAAGGGTTCGATCG         | -2  | CCCAAGTGCATGGGAAGTCTCAACGGCAAGCA       | This study |
|        |        |    | -1   | ATGATCAGGCCGTTAAGTTTATTGCTTCAAAA         | -1  | <i>TAGGTTGAGGCCGTTGAGCACCGCCCGCAA</i>  |            |
| 8      | PCF460 | 3  |      |                                          | -4  | CTGTTTCGCCATGTGTCTTCTACCCTTTCGA        | This study |
|        |        |    |      |                                          | -3  | GATCGTATCGACGTGATGATGAGGGACATCGA       |            |
|        |        |    |      |                                          | -2  | <i>TTCTGCATTACGGGCGCTCGGAGGGGAAGTT</i> |            |
|        |        |    |      |                                          | -1  | GATTTCAAAGGACCTCCGGCGAAGTCGTCAA        |            |
| 9      | PCF458 | 4  | -2   | GTTTCATCCTTGAACATAAACCTTTTATCGTCT        | -2  | ATGATCAGGCCGTTAAGTTTATTGCTTCAAAA       | This study |
|        |        |    | -1   | AAAATGAAGCCCGTTGGTCCGCACGGACTGGA         | -1  | CCCAAGTGCATGGGAAGTCTCAACGGCAAGCA       |            |
| TE TFP |        |    |      |                                          |     |                                        |            |
| 1      | PCF194 | 1  | -1   | GGCCAGTCCCTTGCGGACCTTCCGGTCCGATT         |     |                                        | This study |
| 2      | PCF190 | 1  | -1   | CTGTGCCGATTTTCAGGGCGTTGGCTGTGTCA         |     |                                        | This study |
| 3      | PCF189 | 1  | -2   | TCAGAACTGGCAACATAAAGACCCTGTCTACT         |     |                                        | This study |
|        |        |    | -1   | <i>TGTTCTTCTTCACTGTCCCTTATTGCGACCT</i>   |     |                                        |            |
| 4      | PCF192 | 1  | -2   | TCACATCAACCTGGGTCTTGGCCTTCCAGTT          |     |                                        | This study |
|        |        |    | -1   | <i>AGCTGTCCCTGATGGTCTCATCTACCTGCCT</i>   |     |                                        |            |
| 5      | PCF191 | 2  | -2   | TGGGTCCGCTTTGATTTCCAGAGTCTTCTTCG         |     |                                        | This study |
|        |        |    | -1   | CAGATCCTTCTACGAGCACTCTGGCGGGTCT          |     |                                        |            |
| 6      | PCF188 | 3  | -2   | AGAAGGGTGACACCGGAGACACCGGTGCAGTG         | -1  | AAGAATGCCAACGCCGTAAACATCCTCGGTAA       | (1)        |
|        |        |    | -1   | GTTTGGCTGGATAACGGTCACTGGTTCCCA           |     |                                        |            |
| M1 DNP |        |    |      |                                          |     |                                        |            |
| 1      | PCF247 | 1  | -2   | CTCCTTAATGCTCAAGTACTTAACGGAGTTCA         |     |                                        | This study |
|        |        |    | -1   | <i>CCGTACATGAAGTGAAGGGACAGGATGTCCCA</i>  |     |                                        |            |
| 2      | PCF254 | 1  | -1   | TACTTGACACAACGACCCACTACAGACGCTAGT        |     |                                        | This study |
| 3      | PCF253 | 1  | -1   | TGCGTAGTGTGTATCAAACCGGTATCTATAAT         |     |                                        | This study |
| 4      | PCF249 | 2  | -2   | ACCGCCGATAGGGTCACGATTACTGTGAGAG          | -1  | TCGCCAGAGACTTGGGAGACGGGTATCGCAGT       | This study |
|        |        |    | -1   | <i>GGGATGTCCGGGGGTGCTTCACGTAGGCCTT</i>   |     |                                        |            |
| 5      | PCF252 | 2  | -3   | <i>CTCAGTTCGGTGTAGGTCGTTGCTCCAAGCT</i>   |     |                                        | This study |
|        |        |    | -2   | ACTTGCGGGTACAGCCGCTCAATCCCTTTGC          |     |                                        |            |
|        |        |    | -1   | ATCCAGAGCAGGCACTGTACTGGGGCACGCAC         |     |                                        |            |
| 6      | PCF256 | 2  | -2   | ACATTGAATAGTTGCACGGAGTACGTGACTT          | -1  | ATCCTTGGGCATCTGTCTTCCAAACCACGCA        | This study |
|        |        |    | -1   | ACTTGCGGGTACAGCCGCTCAATCCCTTTGC          |     |                                        |            |
| M1 TFP |        |    |      |                                          |     |                                        |            |
| 1      | PCF289 | 1  |      |                                          | -1  | AGCCTTAGTTTACTTGCGGGCGATTGGGAACT       | This study |
| 2      | PCF290 | 1  | -2   | ACAACGATATCTCAAACCTAGCTGCCCTGACA         |     |                                        | This study |
|        |        |    | -1   | <i>CTGACGCTCAGTGAACGAAAACCTCAGTTAA</i>   |     |                                        |            |

*(Table 3.1 continued)*

| Strain | PCF#   | #* | Pos†                 | CRISPR1 sequence‡                                                                                                                                 | Pos      | CRISPR2 sequence                                                            | Ref        |
|--------|--------|----|----------------------|---------------------------------------------------------------------------------------------------------------------------------------------------|----------|-----------------------------------------------------------------------------|------------|
| 3      | PCF294 | 2  | -2<br>-1             | GTTTAACCACGCCACTTAGTGCTGCACAGGGT<br><i>GGTGTGGTCGCCATGATCGCGTAGTCGATAGT</i>                                                                       | -1       | TTCCAGTTCCCAATCGCCCCGAGGTAACCTAA                                            | This study |
| 4      | PCF293 | 2  | -1                   | GTTTAACCACGCCACTTAGTGCTGCACAGGGT                                                                                                                  | -1       | TAGCGCAGTGCTAACCTCGGCGCAGCTATGA                                             | This study |
| 5      | PCF292 | 2  | -2<br>-1             | ACAACGATATCTCAAACCTAGCTGCCCTGACA<br>CTAACCCGCTCGCGCGTACGTACCCATTAGC                                                                               |          |                                                                             | This study |
| 6      | PCF295 | 3  | -3<br>-2<br>-1       | GTTTAACCACGCCACTTAGTGCTGCACAGGGT<br><i>AAATCAAAACTGGTGAAACTCAGCCAGGGATT</i><br>CGGAGCCAGCCCCGTACCCCATTAGTAACT                                     | -2<br>-1 | <i>TCCGCACCAACCGCGAGCCCCGACTCGGTAAT</i><br>GCACAGCTTAGTGCGGTACAGGCAAACCTACA | This study |
| 7      | PCF296 | 4  | -4<br>-3<br>-2<br>-1 | GTTTAACCACGCCACTTAGTGCTGCACAGGGT<br><i>TTAGCGAGGTGCCGCCGGCTTCCATTTCAGGTC</i><br>TAACCCAGTAATAACCCCTGTACAGGCAGCTA<br>GGTAACACCCCTGTGGTGGTGCACACCAA | -2<br>-1 | <i>ATGTCATGATAATAATGGTTTCTTAGACGTCA</i><br>CAGATGATTTACCTTGCGCAGGAGTTCAGTGA | This study |
| TE TMP |        |    |                      |                                                                                                                                                   |          |                                                                             |            |
| 1      | PCF258 | 1  |                      |                                                                                                                                                   | -1       | GGATGCCTTCTCCACTCTTTGCCAACCTGAC                                             | This study |
| 2      | PCF267 | 1  | -1                   | TCTTGATGGTGTATGTCACCTTCGACTTTCTGC                                                                                                                 |          |                                                                             | This study |
| 3      | PCF269 | 1  | -1                   | TACCCCATAGGCTGCTCCCGCATTTCAGCAGTT                                                                                                                 |          |                                                                             | This study |
| 4      | PCF273 | 1  | -1                   | CTGAATGCCTTGTCTGCACCGTCTCGTCCAA                                                                                                                   |          |                                                                             | This study |
| 5      | PCF266 | 1  | -2<br>-1             | <i>TGACGATGAGCGCATTGTTAGATTTACATACAC</i><br>TCAGTCTCAAAGTGACTCGGTTCTGTGGTTCT                                                                      |          |                                                                             | This study |
| 6      | PCF275 | 1  | -1                   | GCCCAGCAGATGCGCCTGGTGAATAAGCGTTT                                                                                                                  |          |                                                                             | This study |
| 7      | PCF271 | 2  | -1                   | CATTGCAACACGGTTACTTTCCAATGCTTTTCG                                                                                                                 | -1       | GCATTCAGGACTTGAACCGCCAGTTCGGTGCT                                            | This study |
| 8      | PCF264 | 2  | -2<br>-1             | <i>GTCGATAGTGGCTCCAAGTAGCGAAGCGAGCA</i><br><i>CCGATGCCCGCGAAGCGAGAAGAAATCATAAT</i>                                                                | -2<br>-1 | GAGGAGCAGAGTTGATCCGGGTAACATTCATC<br>ACGAATTTGATTTCGCTGGCCCGCCTCCTCAGA       | This study |
| 9      | PCF263 | 2  | -1                   | AGCAGAGTTGATCCGGGTAACATTCATCGGGC                                                                                                                  | -2<br>-1 | GCACCTGCACCACGCCAAGACCTGCGCCGTT<br><i>CGATAGCGGAGTGATACTGGCTTAACATATGC</i>  | This study |
| 10     | PCF261 | 2  | -1                   | GAGGAGCAGAGTTGATCCGGGTAACATTCATC                                                                                                                  | -1       | ATACGCTGCTGGGCCATTACATCATCAATGCG                                            | This study |
| 11     | PCF268 | 2  | -2<br>-1             | GGAGCCGCATTCATACCAATCGTGCTTTTAC<br>TTTGAGACTGACAAGGCGTCTATGCCCGGGC                                                                                | -1       | <i>TCATGATAATAATGGTTTCTTAGACGTCAGGT</i>                                     | This study |
| 12     | PCF274 | 3  | -3<br>-2<br>-1       | CCAGTCGAATACTTCTTTCAACAGGTCTCCTT<br>TCAGGGACTTGGCAACGATCCTCGACAGTAAT<br>TCGACAAGAAGCTTGACAGTCTTGAAGCGCCA                                          |          |                                                                             | This study |
| 13     | PCF257 | 3  | -3<br>-2<br>-1       | TTCACCGAAACCACCTTGAAGATTTGGTTCT<br>CATGAAGCCGATTTCTTTCTGGAATGTCTCTT<br>GAATGAAAGGTCAGTTGGCGGAAGGTATCCC                                            |          |                                                                             | This study |
| 14     | PCF259 | 2  | -3<br>-2<br>-1       | AGCAGGTACAGCAGATGACATCTCCTCGTGCA<br>TTTGAGACTGACAAGGCGTCTATGCCCGGGC<br>ACTACGGATACGGCCTGCCATCGCACGGTTTTT                                          |          |                                                                             | This study |
| 15     | PCF272 | 3  | -1                   | GTCGCAGCTACGAAGGCCGCTTGGACGAGAC                                                                                                                   | -2<br>-1 | CCCGGATCAACTCTGCTCCTCTCTCCCTCGT<br>AATACCGACGCGCCGGAGGCGAATACCCATA          | This study |
| 16     | PCF262 | 3  | -2<br>-1             | GCCTACGACAAATCAGCCAGCAGATGCGCCT<br>TACCCCATAGGCTGCTCCCGCATTTCAGCAGTT                                                                              | -1       | GAGGAGCAGAGTTGATCCGGGTAACATTCATC                                            | This study |

\*number of phage-targeting spacers †spacer position in array ‡Anti- $\phi$  spacers with a GG PAM, anti- $\phi$  spacer with a GA PAM, anti-plasmid spacers with a GG PAM.

**Table S2.** Plasmids and oligonucleotides used in this study

| Name                    | Description/ sequence (5'-3')                               | Reference/ description                |
|-------------------------|-------------------------------------------------------------|---------------------------------------|
| <b>Plasmids</b>         |                                                             |                                       |
| pPF712                  | Priming protospacer, Tc <sup>R</sup> and mCherry            | (1)                                   |
| pPF718                  | pPF712 with $\phi$ TE tail fibre protein gene (phiTE_215)   | (1)                                   |
| pPF971                  | pPF712 with $\phi$ M1 RNA polymerase gene (phiM1_31)        | This study                            |
| pPF981                  | pPF712 with $\phi$ TE tape measure protein gene (phiTE_228) | This study                            |
| pPF1251                 | pPF712 with $\phi$ TE DNA polymerase gene (phiTE_10)        | This study                            |
| pPF1252                 | pPF712 with $\phi$ M1 tail fibre protein gene (phiTE_44)    | This study                            |
| <b>Oligonucleotides</b> |                                                             |                                       |
| PF174                   | CGTTAGAGTGATCGGGCTAC                                        | F for CRISPR1 (binds in leader)       |
| PF175                   | CAATGGCTCAGGGGATTC                                          | R for CRISPR1 (binds spacer 2)        |
| PF176                   | GGTAACTACCGTAAAAATAGGAACG                                   | F for CRISPR2 (binds in leader)       |
| PF177                   | GCCTTTAAGCGCATGTGC                                          | R for CRISPR2 (binds spacer 2)        |
| PF178                   | CTTTAATAATCTGGTTGTTAGTGTG                                   | F for CRISPR3 (binds in leader)       |
| PF179                   | CCTCAGAAAGCCGACTTC                                          | R for CRISPR3 (binds spacer 2)        |
| PF1635                  | TTTGGTACCATAAGGTCGTTGAAGTTCCTGG                             | F for amplifying $\phi$ TE TFP (KpnI) |
| PF1636                  | TTTCTCGAGCTACAGTAGCAACAGTACCTTTC                            | R for amplifying $\phi$ TE TFP (XhoI) |
| PF1637                  | TTTGGTACCACAAGAGTTTATATCAGCAACTGG                           | F for amplifying $\phi$ M1 RNP (KpnI) |
| PF1638                  | TTTCCCGGGATGAAGAATTCAGACTCTCTCACC                           | R for amplifying $\phi$ M1 RNP (SmaI) |
| PF2021                  | TTTGGTACCACTAATGGCTGCATCTGG                                 | F for amplifying $\phi$ TE TMP (KpnI) |
| PF2022                  | TTTCTCGAGATTGATTAGTTAGGCCACC                                | R for amplifying $\phi$ TE TMP (XhoI) |
| PF2144                  | CATGAACCATACAATAGCCC                                        | R 200 bp ds of $\phi$ TE TFP gene     |
| PF2146                  | TCACGGTTCCAACAAAATGC                                        | R 150 bp ds of $\phi$ TE TFP 2 spacer |
| PF2371                  | TTTCTCGAGATGGATGCACCTTGTAAGTTACC                            | F for amplifying $\phi$ TE DNP (XhoI) |
| PF2372                  | TTTGGTACCGTATATGATAGCGAGGCCAGC                              | R for amplifying $\phi$ TE DNP (KpnI) |
| PF2373                  | TTTCTCGAGTACCATTCTGAGTATCCTACC                              | F for amplifying $\phi$ M1 TFP (XhoI) |
| PF2374                  | TTTCCCGGGAGTCATCAAGCATAACCTCTGC                             | R for amplifying $\phi$ M1 TFP (SmaI) |

**Table S3.** Efficiency of plating, plaque sizes and escape type

| Strain        | No. spacers | EOP $\pm$ sd                                | Plaque size range (mm)* | Esc type † |
|---------------|-------------|---------------------------------------------|-------------------------|------------|
| WT            | 0           | $1.0 \times 10^0 \pm 2.3 \times 10^{-1}$    | 2.5-5                   |            |
| <b>TE DNP</b> |             |                                             |                         |            |
| 1             | 1           | $3.6 \times 10^{-1} \pm 3.9 \times 10^{-2}$ | 0.5-2.5                 | P/G        |
| 2             | 1           | $9.2 \times 10^{-2} \pm 8.7 \times 10^{-3}$ | 0.5-2.5                 | P/G        |
| 3             | 1           | $9.3 \times 10^{-2} \pm 3.3 \times 10^{-2}$ | <0.5-1                  | P/G        |
| 4             | 1           | $1.6 \times 10^{-2} \pm 3.8 \times 10^{-4}$ | 0.5-1.5                 | P/G        |
| 5             | 2           | $2.2 \times 10^{-2} \pm 4.7 \times 10^{-3}$ | <0.5-1.5                | P          |
| 6             | 2           | $4.0 \times 10^{-3} \pm 9.0 \times 10^{-4}$ | <0.5-1                  | P          |
| 7             | 3           | $7.9 \times 10^{-3} \pm 2.0 \times 10^{-3}$ | <0.5-1                  | P          |
| 8             | 3           | $1.5 \times 10^{-4} \pm 6.9 \times 10^{-5}$ | All <0.5                | P          |
| 9             | 4           | $3.0 \times 10^{-5} \pm 1.5 \times 10^{-5}$ | All <0.5                | P          |
| <b>TE TFP</b> |             |                                             |                         |            |
| 1             | 1           | $1.9 \times 10^{-1} \pm 3.4 \times 10^{-2}$ | 0.5-3                   | P/G        |
| 2             | 1           | $9.2 \times 10^{-3} \pm 2.4 \times 10^{-3}$ | <0.5-3.5                | P/G        |
| 3             | 1           | $1.4 \times 10^{-2} \pm 3.0 \times 10^{-3}$ | All <0.5                | P/G        |
| 4             | 1           | $9.1 \times 10^{-3} \pm 1.7 \times 10^{-3}$ | 0.5-4                   | P/G        |
| 5             | 2           | $2.1 \times 10^{-5} \pm 0.0 \times 10^{-0}$ | All <0.5                | P          |
| 6             | 3           | $1.1 \times 10^{-5} \pm 3.6 \times 10^{-6}$ | 0.5-3.5                 | G          |
| WT            | 0           | $1.0 \times 10^0 \pm 2.4 \times 10^{-1}$    | 2.5-4                   |            |
| <b>M1 DNP</b> |             |                                             |                         |            |
| 1             | 1           | $3.8 \times 10^{-1} \pm 1.3 \times 10^{-1}$ | 2-4                     | P          |
| 2             | 1           | $6.1 \times 10^{-2} \pm 9.8 \times 10^{-3}$ | 0.5-2.5                 | P          |
| 3             | 1           | $1.5 \times 10^{-2} \pm 2.7 \times 10^{-3}$ | 0.5-2                   | P          |
| 4             | 2           | $1.3 \times 10^{-2} \pm 4.8 \times 10^{-3}$ | <0.5-2                  | P          |
| 5             | 2           | $1.4 \times 10^{-2} \pm 3.5 \times 10^{-3}$ | <0.5-2                  | P          |
| 6             | 3           | $8.3 \times 10^{-4} \pm 1.9 \times 10^{-4}$ | <0.5-2                  | P          |
| <b>M1 TFP</b> |             |                                             |                         |            |
| 1             | 1           | $4.0 \times 10^{-1} \pm 1.9 \times 10^{-4}$ | 2-3                     | P          |
| 2             | 1           | $2.1 \times 10^{-1} \pm 2.7 \times 10^{-2}$ | 1-2.5                   | P          |
| 3             | 2           | $1.4 \times 10^{-1} \pm 1.2 \times 10^{-1}$ | 1-2.5                   | P          |
| 4             | 2           | $4.0 \times 10^{-2} \pm 2.6 \times 10^{-2}$ | 0.5-1.5                 | P          |
| 5             | 2           | $3.1 \times 10^{-2} \pm 2.9 \times 10^{-2}$ | 0.5-1.5                 | P          |
| 6             | 3           | $2.5 \times 10^{-1} \pm 1.3 \times 10^{-1}$ | 1-2.5                   | P          |
| 7             | 3           | $8.4 \times 10^{-3} \pm 1.8 \times 10^{-3}$ | 0.5-1.5                 | P          |
| WT            | 0           | $1.0 \times 10^0 \pm 2.3 \times 10^{-1}$    | 2.5-5                   |            |
| <b>TE TMP</b> |             |                                             |                         |            |
| 1             | 1           | $5.1 \times 10^{-2} \pm 1.2 \times 10^{-2}$ | 0.5-2.5                 | P/G        |
| 2             | 1           | $6.9 \times 10^{-2} \pm 9.2 \times 10^{-3}$ | 0.5-1.5                 | P/G        |
| 3             | 1           | $7.5 \times 10^{-2} \pm 9.6 \times 10^{-3}$ | 0.5-1.5                 | P/G        |
| 4             | 1           | $1.5 \times 10^{-2} \pm 5.0 \times 10^{-3}$ | 0.5-1                   | P/G        |
| 5             | 1           | $3.5 \times 10^{-3} \pm 2.3 \times 10^{-3}$ | All <0.5                | P/G        |
| 6             | 1           | $5.9 \times 10^{-4} \pm 1.4 \times 10^{-4}$ | <0.5-3                  | P/G        |
| 7             | 2           | $1.1 \times 10^{-3} \pm 4.8 \times 10^{-4}$ | All <0.5                | P          |
| 8             | 2           | $2.2 \times 10^{-3} \pm 3.4 \times 10^{-4}$ | All <0.5                | P          |
| 9             | 2           | $2.3 \times 10^{-3} \pm 5.0 \times 10^{-4}$ | All <0.5                | P          |
| 10            | 2           | $8.7 \times 10^{-5} \pm 6.2 \times 10^{-5}$ | All <0.5                | P          |
| 11            | 2           | $1.1 \times 10^{-4} \pm 2.7 \times 10^{-5}$ | All <0.5                | P          |
| 12            | 3           | $1.5 \times 10^{-3} \pm 1.2 \times 10^{-4}$ | All <0.5                | P          |
| 13            | 3           | $1.8 \times 10^{-4} \pm 5.2 \times 10^{-5}$ | All <0.5                | P          |
| 14            | 2           | $6.1 \times 10^{-5} \pm 1.7 \times 10^{-5}$ | All <0.5                | P          |
| 15            | 3           | $2.1 \times 10^{-5} \pm 0.0 \times 10^{-0}$ | All <0.5                | P          |
| 16            | 3           | $2.1 \times 10^{-5} \pm 0.0 \times 10^{-0}$ | All <0.5                | P          |

\*across three replicates; † P=phages that did not heritably escape CRISPR-Cas, G=genotypic escape phages



**Table S4.** Genotypic escape phages

| Esc | Host (TE..)     | #* | Mech† | Pos.§        | Base change      | Codon change | Del/insert size (bp) | Homology/ dup. seq               | EOP ±SD              |
|-----|-----------------|----|-------|--------------|------------------|--------------|----------------------|----------------------------------|----------------------|
| 1   | TFP 2           |    | del   |              |                  |              | 147                  | CACG                             | 1.0 ±0.4             |
| 2   | TFP 2           |    | del   |              |                  |              | 292                  | AGCCAACG                         | 0.9 ±0.2             |
| 3   | TFP 2           | 4  | pm    | 3            | A-G              | D-G          |                      |                                  | 0.8 ±0.2             |
| 4   | TFP 2           | 4  | pm    | 7            | A-G              |              |                      |                                  | 1.0 ±0.2             |
| 5   | TMP 6           | 2  | del   |              |                  |              | 120                  | GGCTAAAGCC                       | 0.8 ±0.5             |
| 6   | TMP 1           |    | pm    | 2            | T-G              |              |                      |                                  | 1.1 ±0.1             |
| 7   | TMP 2           | 2  | pm    | -1           | C-G (CG)         | P-R          |                      |                                  | 1.1 ±0.3             |
| 8   | TMP 1           |    | pm    | -1           | C-T (AG)         | R-C          |                      |                                  | 1.2 ±0.1             |
| 9   | TMP 1           | 2  | pm    | 2            | T-C              |              |                      |                                  | 0.8 ±0.1             |
| 10  | TMP 3           |    | pm    | 1            | A-G              | R-S          |                      |                                  | 0.9 ±0.6             |
| 11  | TMP 6           | 2  | pm    | 5            | C-A              | Q-R          |                      |                                  | 0.8 ±0.1             |
| 12  | TFP 2           |    | pm    | 5            | A-G              | T-A          |                      |                                  | 0.9 ±0.2             |
| 13  | TMP 2           |    | pm    | 2            | C-G              | Q-E          |                      |                                  | 0.8 ±0.1             |
| 14  | TFP 6           |    | del   |              |                  |              | 1,089                | TGAAGGGCGA                       | 1.3 ±0.2             |
| 15  | TFP 6           |    | del   |              |                  |              | 990                  | GGTGACACCGG                      | 0.8 ±0.6             |
| 16  | TMP 6           |    | pm    | 1            | T-C              | L-S          |                      |                                  | 0.7 ±0.3             |
| 17  | TMP 4           | 2  | dup‡  |              |                  |              | 15                   | AGACGTGCAGG<br>ACA               | 1.0 ±0.2             |
| 18  | TMP 4           | 2  | dup   |              |                  |              | 15                   | AGACGTGCAGG<br>ACA               | 0.9 ±0.1             |
| 19  | TMP 1           | 2  | pm    | 25,26,<br>32 | A-T, G-T,<br>C-G | K-I          |                      |                                  | 1.1 ±0.7             |
| 20  | TFP 3           |    | pm    | -2           | C-T (GA)         | S-F          |                      |                                  | 1.0 ±0.2             |
| 21  | TMP 3           |    | pm    | 2            | A-G              |              |                      |                                  | 0.8 ±0.4             |
| 22  | TMP 4           | 3  | pm    | -2           | C-A (GT)         |              |                      |                                  | 1.1 ±0.1             |
| 23  | TFP 6           | 3  | del   |              |                  |              | 1,968                | GACA                             | 1.3 ±0.6             |
| 24  | TFP 6           |    | del   |              |                  |              | 1,986                | GGTCC                            | 1.0 ±0.1             |
| 25  | TFP 4           |    | pm    | -2           | C-G (GC)         | P-A          |                      |                                  | 0.9 ±0.2             |
| 26  | TFP 4           | 2  | pm    | 4            | T-C              |              |                      |                                  | 0.9 ±0.1             |
| 27  | TFP 4           |    | pm    | 3            | C-T              | T-I          |                      |                                  | 0.8 ±0.5             |
| 28  | TFP 2           |    | del   |              |                  |              | 57                   | AGCC                             | 1.0 ±0.2             |
| 29  | TFP 2           |    | pm    | -2           | C-A (GT)         | P-T          |                      |                                  | 1.1 ±0.2             |
| 30  | TFP 2           |    | del   |              |                  |              | 144                  | CCTGTG                           | 0.9 ±0.8             |
| 31  | TFP 2           |    | pm    | -1           | C-G (CG)         | P-R          |                      |                                  | 1.0 ±0.2             |
| 32  | TFP 3           |    | del   |              |                  |              | 246                  | GTGTC/<br>GTATC                  | 1.2 ±0.2             |
| 33  | TFP 3           |    | pm    | 1            | A-C              | S-R          |                      |                                  | 1.1 ±0.2             |
| 34  | TFP 3           |    | pm    | 1            | A-G              | S-G          |                      |                                  | 1.3 ±0.2             |
| 35  | TFP 1&<br>TFP 6 | 2  | del   |              |                  |              | 1,719                | AAGGGTGACAC                      | 0.7 ±0.5<br>0.8 ±0.2 |
| 36  | TFP 1           |    | del   |              |                  |              | 462                  | CCAATCGG/CC<br>GCAGGG            | 1.4 ±0.4             |
| 37  | TFP 1           |    | del   |              |                  |              | 729                  | GGTGACAC                         | 1.2 ±0.3             |
| 38  | TFP 1           |    | del   |              |                  |              | 783                  | AAGGGTGACAC<br>TGGCCCAACTG<br>GT | 0.7 ±0.4             |
| 39  | TMP 4           |    | pm‡   | -2           | C-T (GA)         |              |                      |                                  | 1.0 ±0.3             |
| 40  | TMP 4           |    | del‡  |              |                  |              | 45                   | CCGCC                            | 0.8 ±0.2             |
| 41  | TMP 5           |    | pm    | -1           | C-T (AG)         |              |                      |                                  | 1.0 ±0.0             |
| 42  | TFP 6           |    | del   |              |                  |              | 2,004                | TACTGGTCCAA<br>CAGG              | 1.1 ±0.0             |
| 43  | TFP 6           |    | del   |              |                  |              | 1,968                | CCGCAGGGTG                       | 1.1 ±0.0             |
| 44  | TFP 6           |    | del   |              |                  |              | 1,968                | AGGTCCAG                         | 1.0 ±0.1             |

\*Number of times isolated; † Mechanism of escape: pm=point mutation, del=deletion, dup=duplication; ‡Esc 5 (120 bp del) background; § position of point mutation: -1, -2=PAM, 1,2,3...=protospacer; || top/coding strand, () new PAM sequence.

## Supplementary Reference

1. Pawluk A, Staals RHJ, Taylor C, Watson BNJ, Saha S, Fineran PC, Maxwell KL, Davidson AR. 2016 Inactivation of CRISPR-Cas systems by anti-CRISPR proteins in diverse bacterial species. *Nature Microbiology*; 1(8):16085.
